# Supplementary material for: Systemic Characterization of the Gut Microbiota Profile after Single Mild Ischemic Stroke and Recurrent Stroke in Mice
Source: MDPI journal article supplement (doi:10.3390/biomedicines12010195), 2024-01-16
Supplement: s1 [file s1]

Supplemental Figure S1

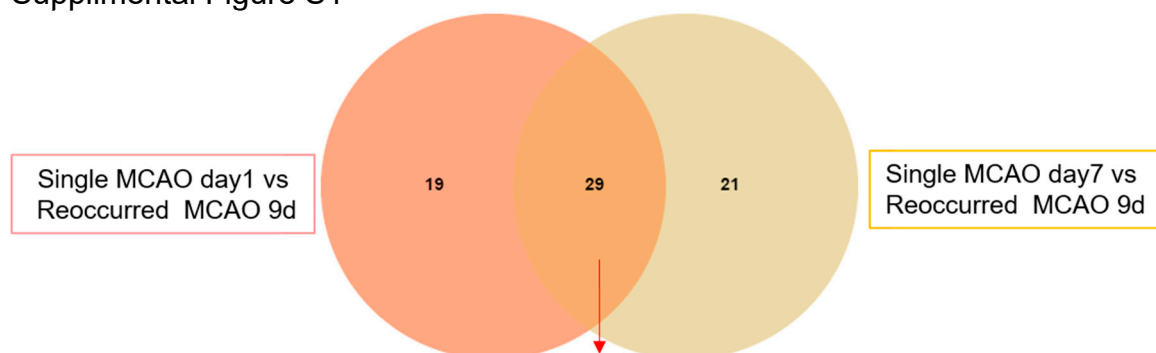

| Common Metabolic Pathway (continued from Figure 5B) |                                                                                             |    |                                                                                         |
|-----------------------------------------------------|---------------------------------------------------------------------------------------------|----|-----------------------------------------------------------------------------------------|
| 15                                                  | <b>Superpathway of C1 Compounds Oxidation to CO2</b><br>(PWY-1882)                          | 22 | <b>Octane Oxidation</b><br>(P221-PWY)                                                   |
|                                                     |                                                                                             | 23 | <b>Aromatic Biogenic Amine Degradation</b><br>(PWY-7431)                                |
| 16                                                  | <b>Superpathway of Bacteriochlorophyll a Biosynthesis</b><br>(PWY-5529)                     | 24 | <b>NAD Biosynthesis II</b><br>(from tryptophan)<br>(NADSYN-PWY)                         |
| 17                                                  | <b>Nylon-6 Oligomer Degradation</b><br>(P621-PWY)                                           | 25 | <b>L-tryptophan Degradation to 2-amino-3-Carboxymuconate Semialdehyde</b><br>(PWY-5651) |
| 18                                                  | <b>Ketogluconate Metabolism</b><br>(KETOGLUCONMET-PWY)                                      | 26 | <b>Mycothiol Biosynthesis</b><br>(PWY1G-0)                                              |
| 19                                                  | <b>Meta Cleavage Pathway of Aromatic Compounds</b><br>(PWY-5430)                            | 27 | <b>Methyl Ketone Biosynthesis</b><br>(PWY-7007)                                         |
| 20                                                  | <b>Cob(II)yrinate a,c-diamide Biosynthesis II (late cobalt incorporation)</b><br>(PWY-7376) | 28 | <b>Mono-trans, Poly-cis Decaprenyl Phosphate Biosynthesis</b><br>(PWY-6383)             |
| 21                                                  | <b>Methanol Oxidation to Carbon Dioxide</b><br>(PWY-7616)                                   | 29 | <b>Mycolyl-Arabinogalactan-Peptidoglycan Complex Biosynthesis</b><br>(PWY-6397)         |

**Supplemental Figure S1.** The common altered metabolic pathway after single MCAO day 1 and day7 vs reoccurred MCAO day 9.
